# Supplementary material for: The Dynamic Nature of CO Adlayers on Pt(111) Electrodes
Source: PubMed Central journal article supplement (PMC7187359; doi:10.1002/anie.201913412), 2020-02-18
Supplement: ANIE-59-6182-s001.pdf [file ANIE-59-6182-s001.pdf]

## Supporting Information

### **The Dynamic Nature of CO Adlayers on Pt(111) Electrodes**

*Jie Wei, Reihaneh Amirbeigiarab, Yan-Xia Chen,\* Sung Sakong, Axel Gross, and Olaf M. Magnussen\**

anie\_201913412\_sm\_miscellaneous\_information.pdf  
anie\_201913412\_sm\_Movie\_0.3V.mp4

## Experimental Section

### Electrochemical procedures

The experiments were performed at controlled potential at room temperature ( $\approx 298$  K), using a homebuilt video-STM for *in situ* measurements in electrochemical environment.<sup>[1]</sup> The STM data were recorded in constant height mode at 10 images/s, using polypropylene-covered tungsten tips. Prior to the measurements, the Pt(111) electrode was annealed in an induction oven for 30 min at  $\approx 1000^\circ\text{C}$  in Ar containing 2% CO and then cooled down to room temperature in the same atmosphere. 0.1 M  $\text{H}_2\text{SO}_4$  saturated with CO was used as electrolyte solution, prepared from ultrapure  $\text{H}_2\text{SO}_4$  (Merck) and ultrapure water and saturated by bubbling for 10 min with pure CO gas (Linde, minican). Potentials were measured versus a Ag/AgCl (KCl sat.) reference electrode.

### Density functional theory calculations

Periodic DFT calculations were performed using the software package VASP.<sup>[2]</sup> The exchange-correlation energies are evaluated as suggested by Hammer and Nørskov, known as a revised version of the Perdew-Burke-Ernzerhof (RPBE) functional.<sup>[3]</sup> The Pt(111) surface was modeled by a five-layer slab with a (6x6) surface unit cell. The dispersion interactions between adsorbate-adsorbate and adsorbate-first Pt layer of the slab are included by the semi-empirical D3 dispersion correction scheme of Grimme.<sup>[4]</sup> The RPBE-D3 approach has recently been shown to give a reliable description of the site preference within the CO/Pt(111) system.<sup>[5]</sup> Diffusion barriers of CO are determined by the nudged elastic band (NEB) method with four images.<sup>[6]</sup> The wave functions are expanded up to 400 eV using a plane-wave basis set, and the integral over the first Brillouin zone is done on a 3x3x1 k-point mesh.

## Supplementary STM data

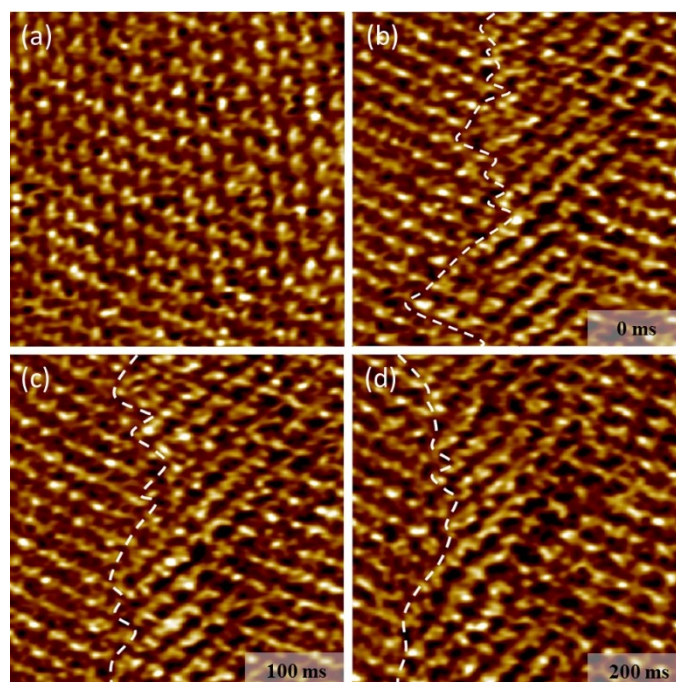

**Figure 1S.** Sequence of *in situ* video STM images (7 nm  $\times$  7 nm) of Pt(111) in CO-saturated 0.1 M  $\text{H}_2\text{SO}_4$  solution at 0.12 V (7 nm  $\times$  7 nm), showing fast positional fluctuations of a domain boundary within the (2  $\times$  2)-3CO adlayer

**0.3V.mp4:**

Video STM sequence of CO/Pt(111) (8 nm  $\times$  8 nm), recorded at 0.30 V at 10 Hz.

## Supplementary DFT results

The CO molecules occupy a high symmetry site on Pt(111) surface when all six neighboring high symmetry sites are free. We have tested the coverage dependence on the electrode potential, as shown in Figure 2S a. The computational electrode is used to determine the formation enthalpy with respect to the gas-phase CO<sub>2</sub> molecule. The fully covered CO only exists below -0.36 V, i.e., in the hydrogen evolution regime. The (2x2)-3CO (Figure 2S b) is stable in the range between -0.36 and 0.20 V. Vacancy formation starts above 0.2 V. We find the DFT calculations to be consistent with the STM experiments.

Any CO jump in a complete (2x2)-3CO adlayer leads to a CO pair placed at the neighboring high symmetry sites. Thus, the (2x2)-3CO adlayer is rigid, and a CO fluctuation is not expected below 0.2 V. When a CO vacancy starts to be formed above 0.2 V, the fluctuating nature of the CO adlayer becomes significant. In Figure 3S, we illustrate the considered CO configurations after CO vacancy formation together with their formation energies. The local minimum energy configuration 3CO<sub>top1</sub> is shown in Figure 3S j.

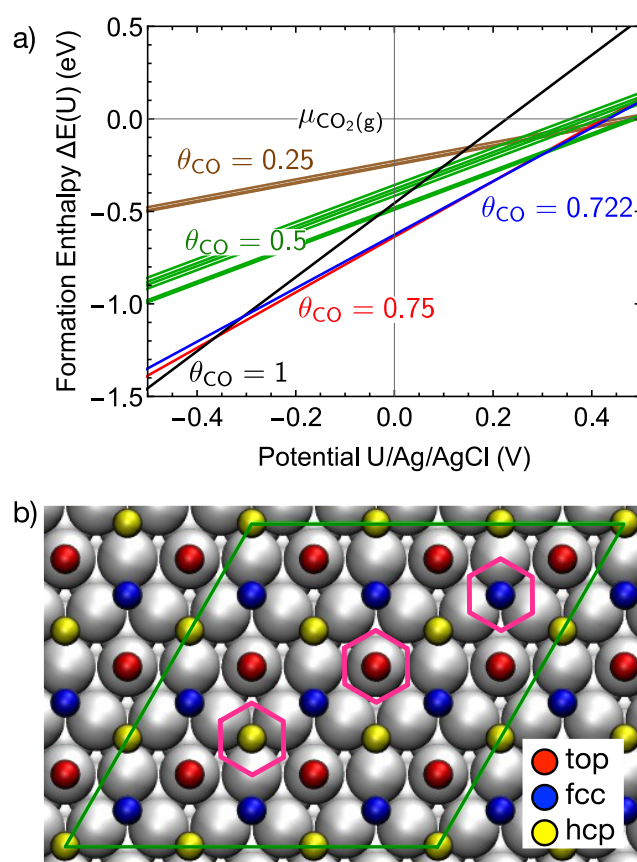

**Figure 2S.** (a) The potential dependence of CO coverage on Pt(111) electrode. (b) Atomic configuration of the (2x2)-3CO structure on Pt(111).



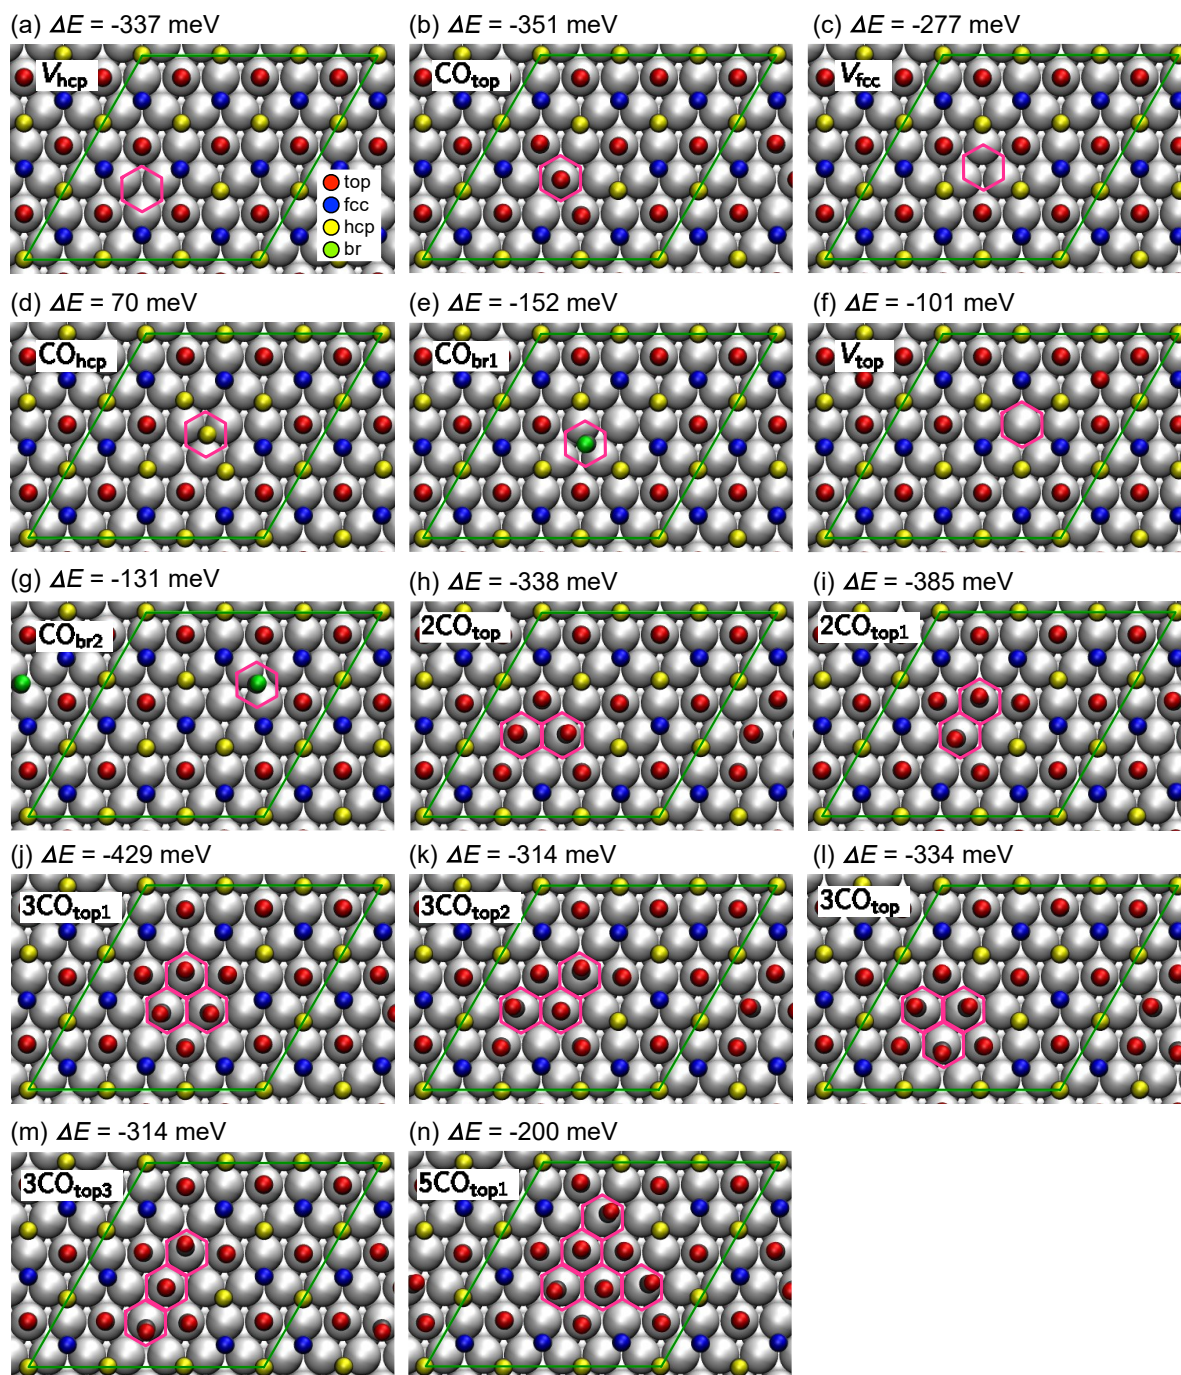

**Figure 3S.** Disordered CO adlayer configurations after creating a CO vacancy. The energies refer to the complete (2x2)-3CO configuration, i.e.,  $\mu_{CO} = \mu[(2 \times 2) - 3CO]$ .

## References

- [1] O. M. Magnussen, *Chemistry—A European Journal* **2019**.
- [2] G. Kresse, J. Furthmüller, *Phys Rev B* **1996**, *54*, 11169.
- [3] B. Hammer, L. B. Hansen, J. K. Nørskov, *Phys Rev B* **1999**, *59*, 7413.
- [4] S. Grimme, J. Antony, S. Ehrlich, H. Krieg, *The Journal of chemical physics* **2010**, *132*, 154104.
- [5] D. Mahlberg, S. Sakong, K. Forster-Tonigold, A. Groß, *Journal of chemical theory and computation* **2019**, *15*, 3250-3259.
- [6] G. Henkelman, B. P. Uberuaga, H. Jónsson, *The Journal of chemical physics* **2000**, *113*, 9901-9904.
